# Supplementary material for: Preparation and Characterization of Oxidized Inulin Hydrogel for Controlled Drug Delivery
Source: MDPI journal article supplement (doi:10.3390/pharmaceutics11070356), 2019-07-22
Supplement: s1 [file s1]

## Supplementary Materials: Preparation and Characterization of Oxidized Inulin Hydrogel for Controlled Drug Delivery

Franklin Afinjuomo, Paris Fouladian, Ankit Parikh, Thomas G. Barclay, Yunmei Song and Sanjay Garg

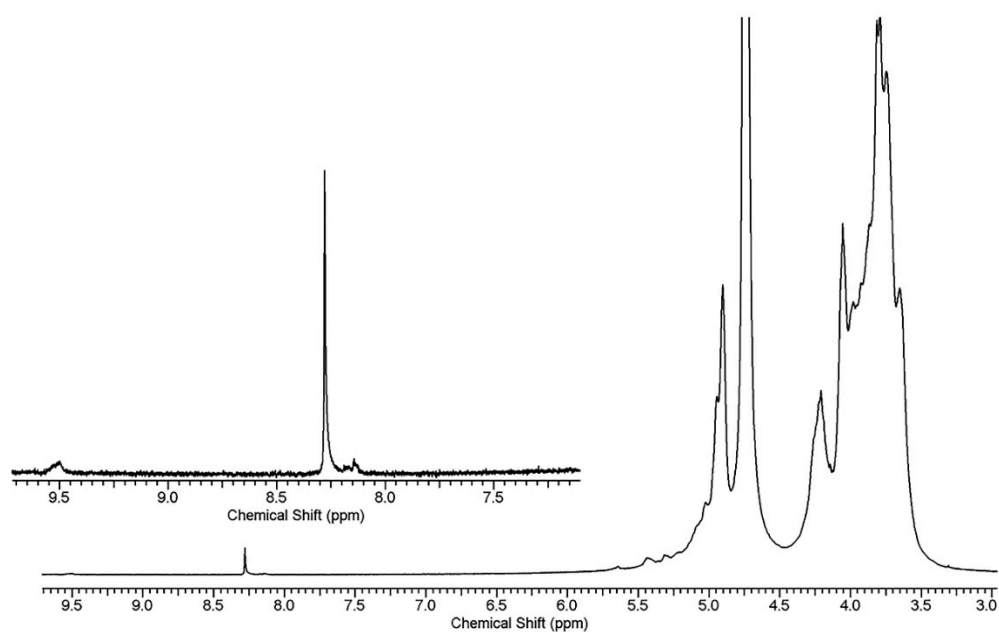

**Figure S1.**  $^1\text{H}$  NMR spectra of inulin oxidation with low-intensity peak of aldehyde at 9.5 ppm as well as peak due to formic acid around 8.25 ppm as the reaction proceed in  $\text{D}_2\text{O}$ .

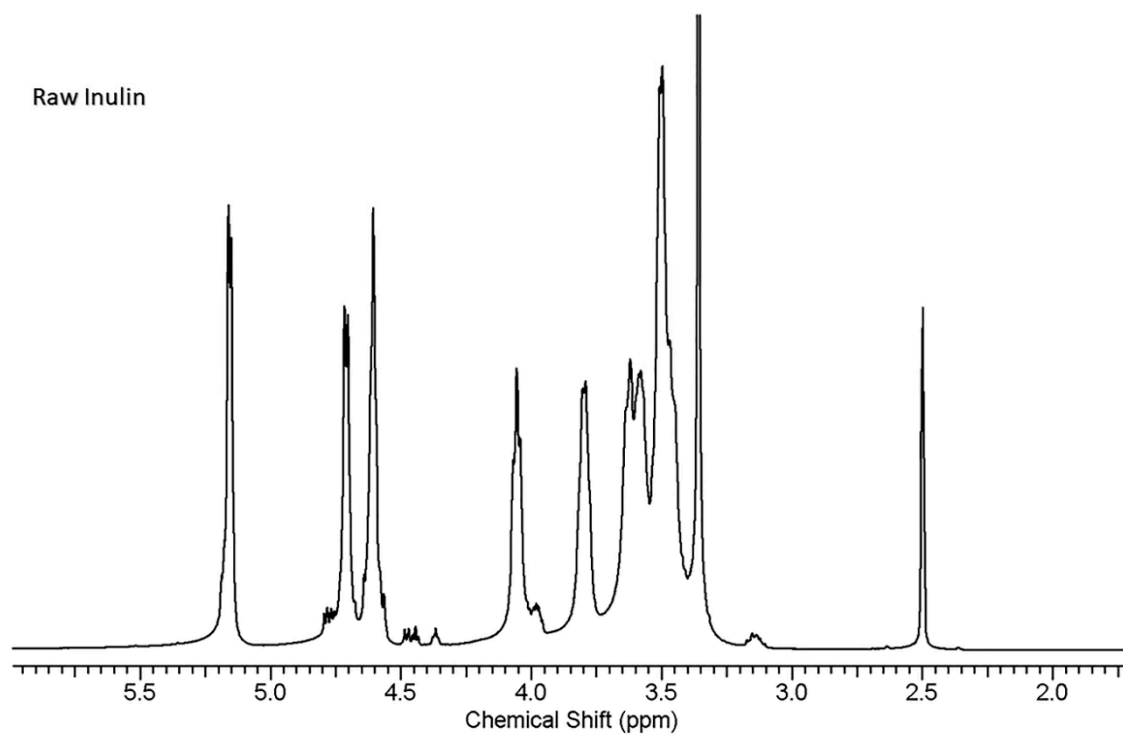

**Figure S2.**  $^1\text{H}$  NMR spectra of raw unmodified inulin in deuterated DMSO solvent.

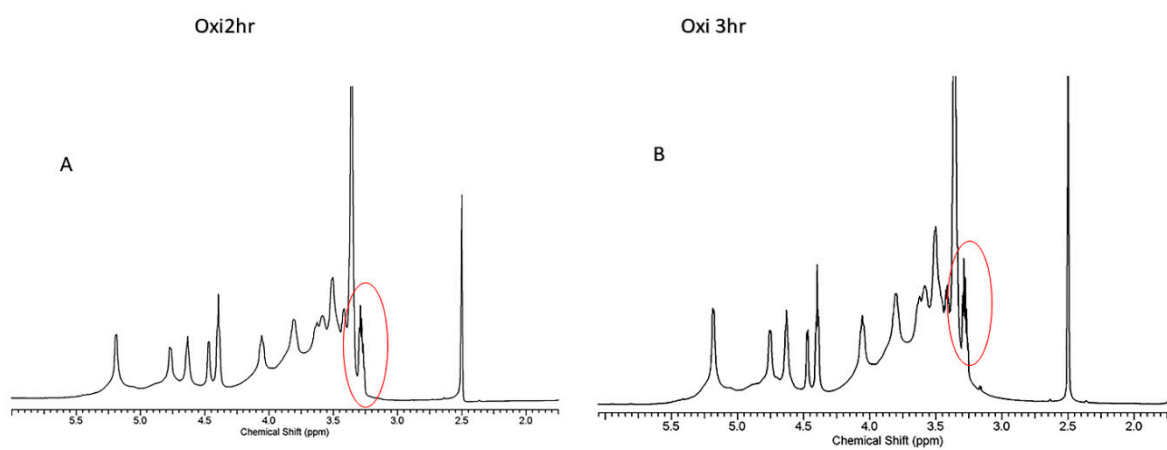

**Figure S3A and B.**  $^1\text{H}$  NMR spectra of oxidized inulin (A) 2 h and (B) 3 h in deuterated DMSO Solvent.

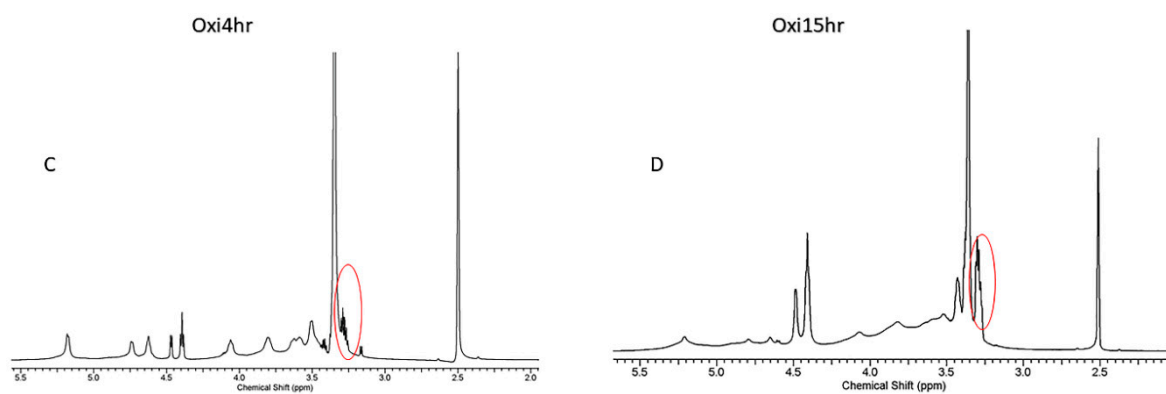

**Figure 3C and D.**  $^1\text{H}$  NMR spectra of oxidized inulin (C) 4 h and (D) 15 h in deuterated DMSO solvent.

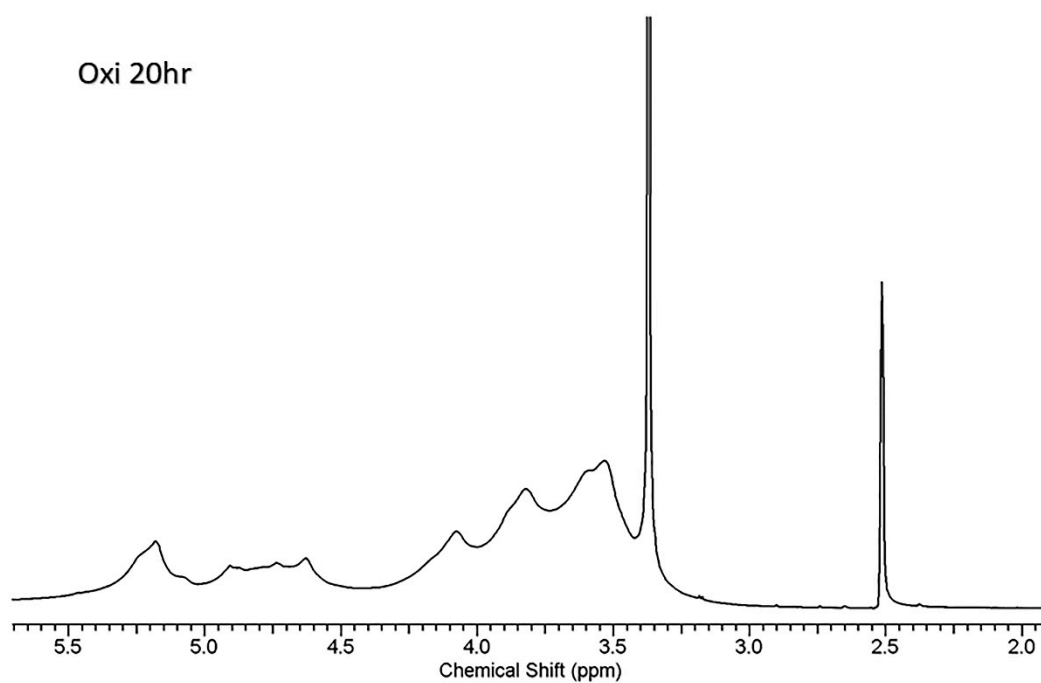

**Figure S3E.**  $^1\text{H}$  NMR spectra of oxidized inulin 20 h in deuterated DMSO solvent.

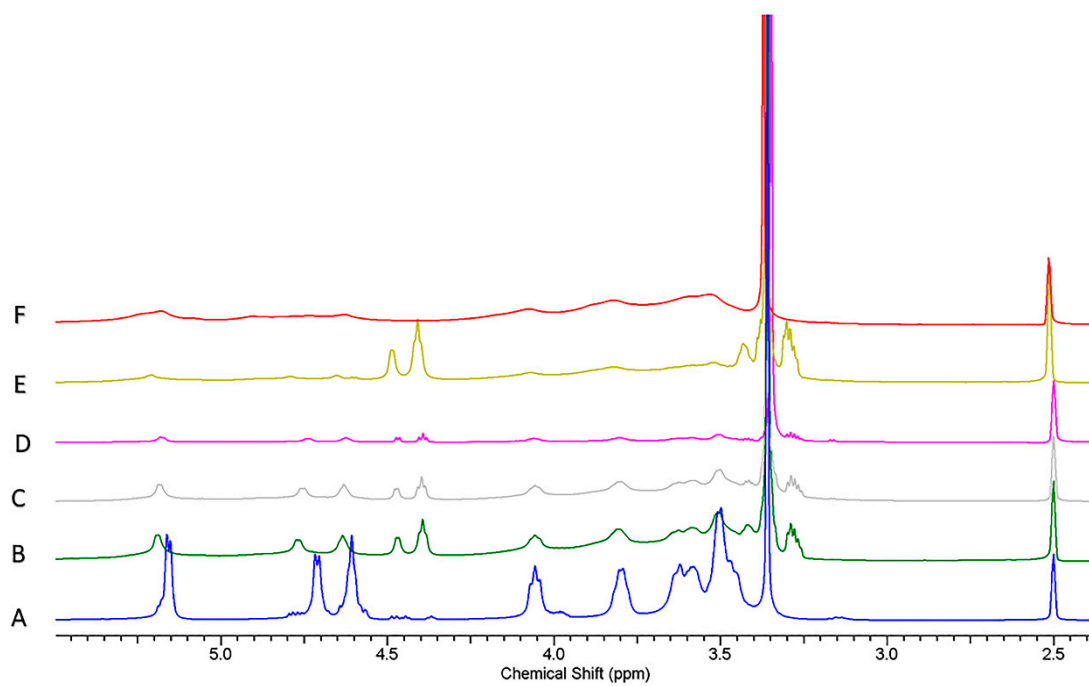

**Figure S4.** <sup>1</sup>H NMR spectra of both raw inulin and all oxidized samples in deuterated DMSO solvent: (A) raw inulin and oxidized inulin (B) 2 h, (C) 3 h, (D) 4 h, (E) 15 h, and (F) 20 h.

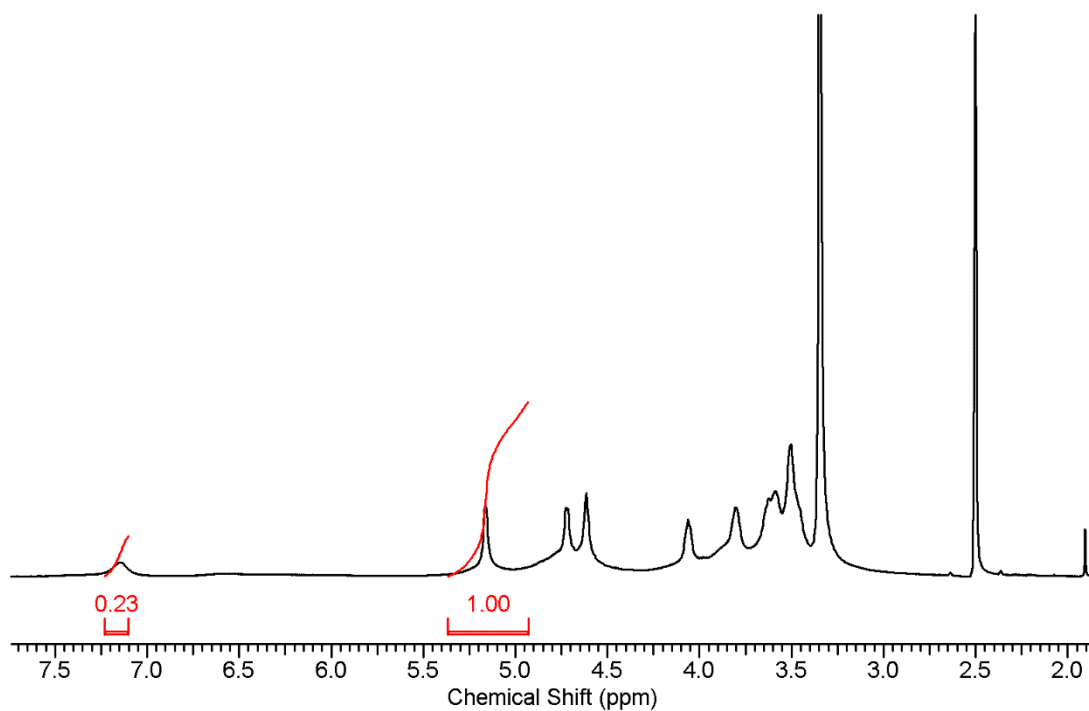

**Figure S5A.** <sup>1</sup>H NMR spectra of OXI2hr reacted with tBC for the determination of DO.

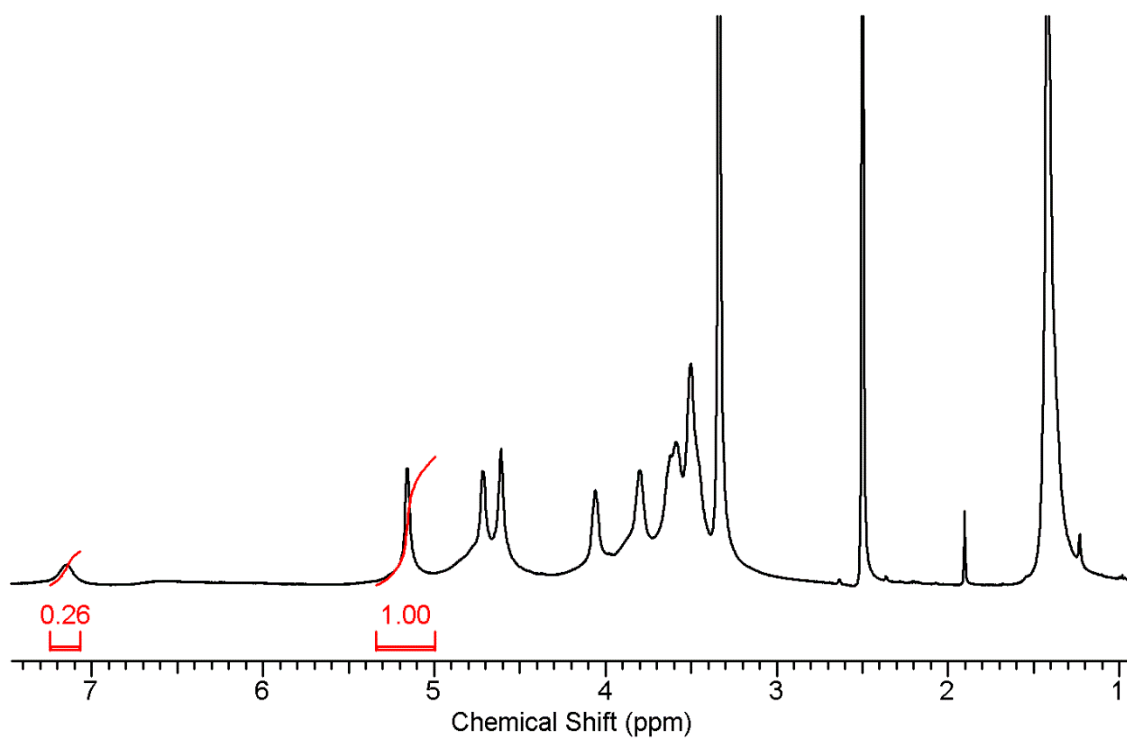

Figure S5B.  $^1\text{H}$  NMR spectra of oxi-3h reacted with tBC for the determination of DO.

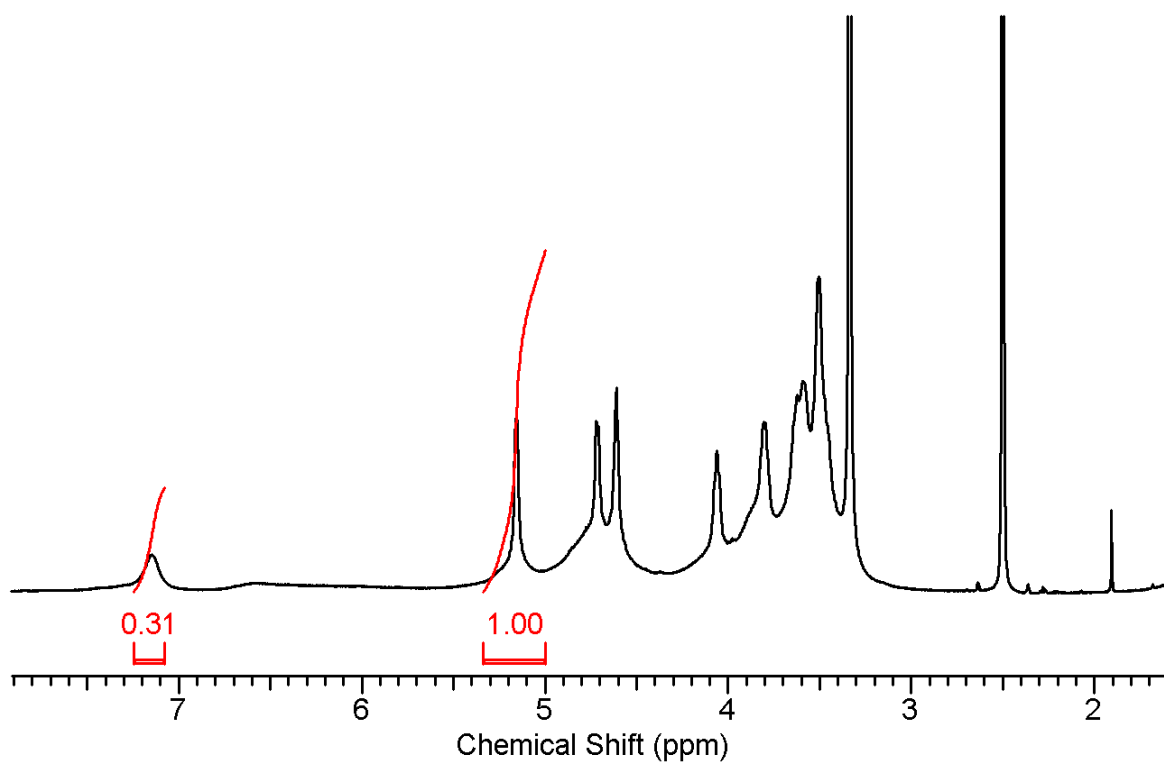

Figure S5C.  $^1\text{H}$  NMR spectra of oxi-4h reacted with tBC for the determination of DO.

## FTIR

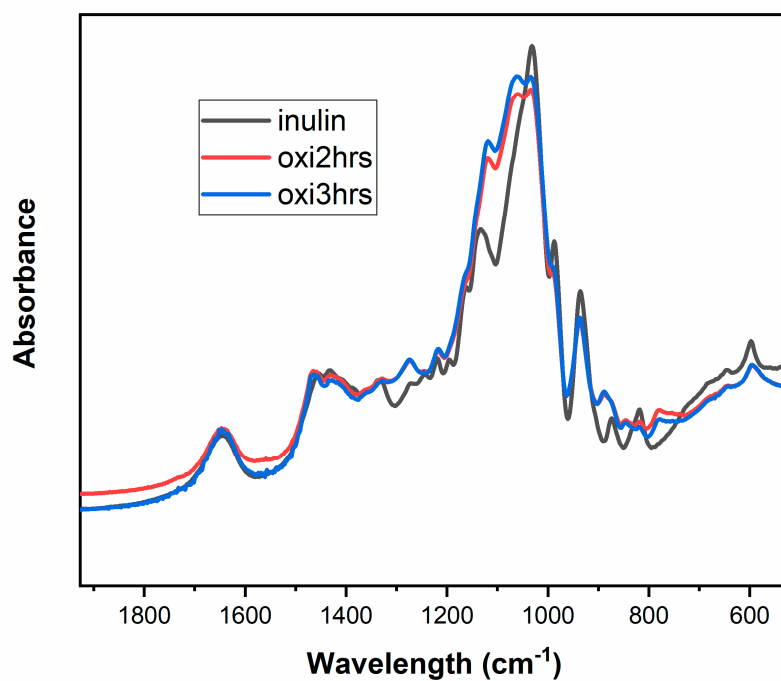

Figure S6A. Slight shift in the FTIR spectra peak for the modified inulin in comparison to raw inulin.

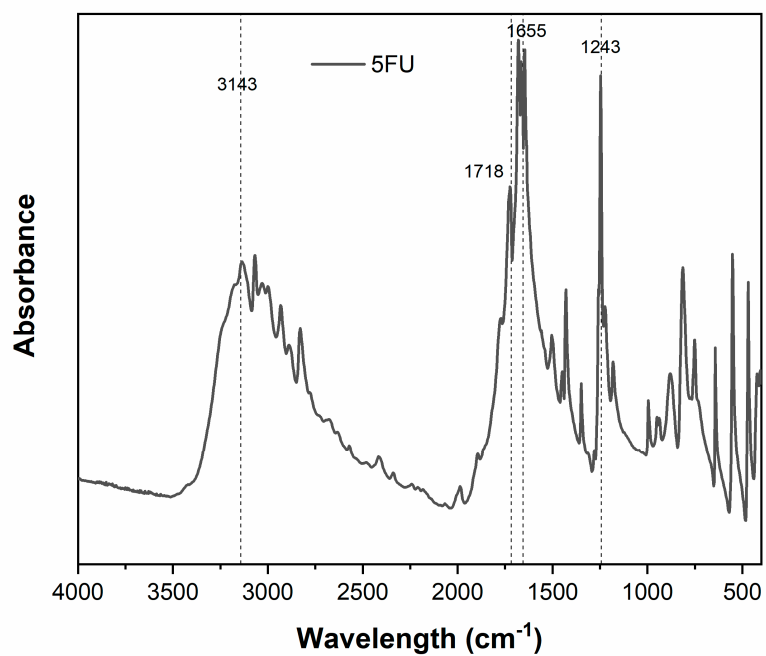

Figure S6B. FTIR spectra of pure 5FU.

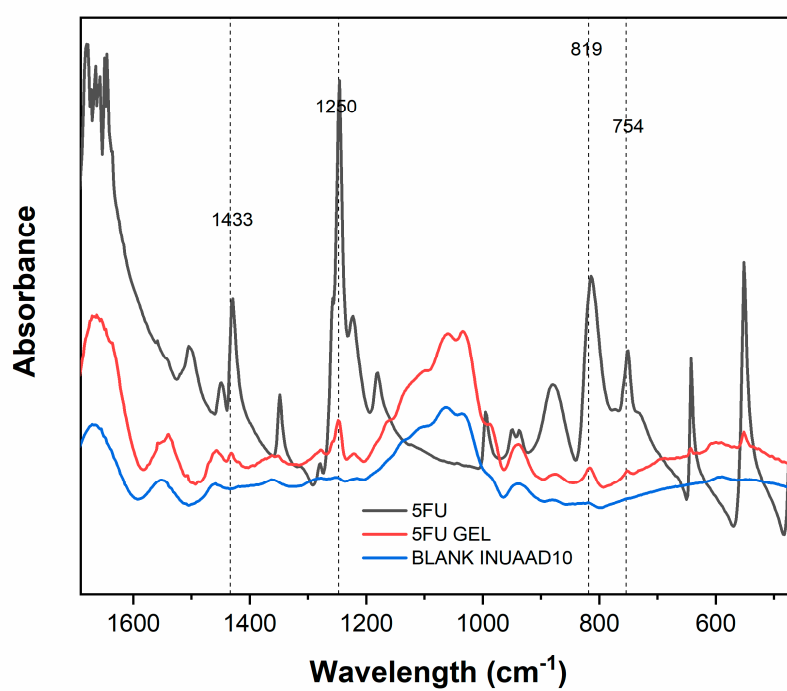

**Figure S6C.** FTIR spectra of pure 5FU, blank INUAAD10, and 5FU-loaded hydrogel.

**Table S1.** Rheological properties of INUAAD hydrogels showing the in elastic moduli ( $G'$ ) and loss modulus ( $G''$ ) at a frequency of 1 Hz.

| Hydrogel         | $G'$ (Pa) | $G''$ (Pa) | Ratio $G''/G'$ |
|------------------|-----------|------------|----------------|
| <b>InuAAD10</b>  | 3015      | 290        | 0.096          |
| <b>InuAAD5</b>   | 1928      | 206        | 0.106          |
| <b>InuAAD2.5</b> | 711.8     | 102        | 0.14           |

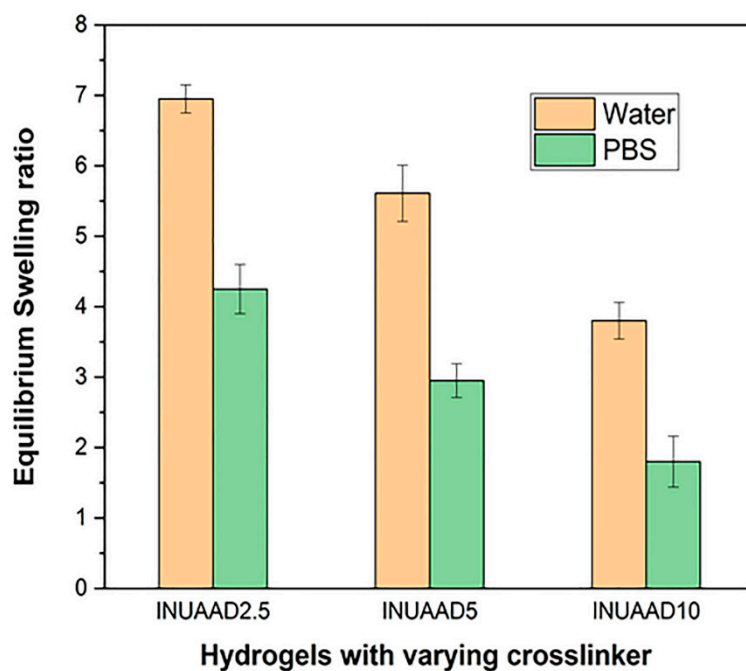

Figure S7. Equilibrium swelling of the inulin hydrogels in PBS and de-ionized water.

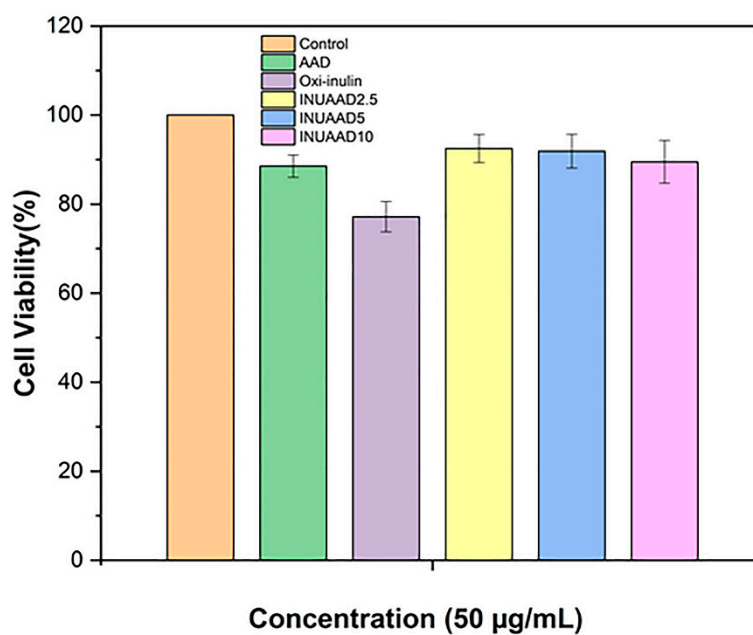

Figure S8. Cell viability of HCT116 cancer cells after treatment with 50 µg/mL of oxidized inulin, AAD, and blank hydrogels.



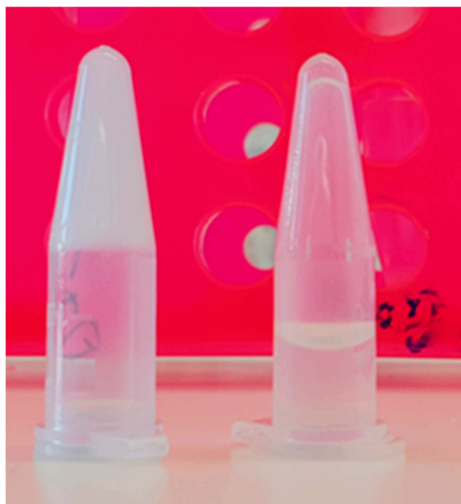

**Figure S9.** Crosslinking of oxidized inulin with ADD resulting in the formation of inulin hydrogel.
